# Supplementary material for: Acquired resistance to BRAF inhibitory treatments requires tumor tissue remodeling and reveals targetable vulnerabilities in colorectal cancer
Source: Research Square preprint supplement (doi:10.21203/rs.3.rs-6770441/v1), 2025-06-25
Supplement: Supplementary file 2 [file c8616239744d74162bafd772.docx]

**SUPPLEMENTARY FIGURE LEGENDS**

**Supplementary Figure 1. CRC PDX *BRAF*V600E models recapitulate patients’ genomics.**

**A,** Oncoplot displaying the most frequently mutated genes above 27% in 32 PDXs. Duplicated samples per condition were counted as one. Mutational frequency per gene in four different conditions and in the TCGA-COADREAD cohort are depicted on the left. At the top, Tumor Mutational Burden (TMB) in variants per megabase is provided for each individual case. 'Multi-hit' refers to genes mutated more than once in the same sample. Black circles indicate variant allele frequencies equal or below 25%. MSS: microsatellite stability, MSI: microsatellite instability. **B,** Top 5 most prevalent COSMIC v3.4 signatures in naive, resistant, and TCGA COADREAD BRAFV600E mutated CRC samples.

**Supplementary Figure 2. PDX *BRAF*V600E models recapitulate patients’ response to treatment.**

**A,** On the left side, tumor growth curves of M64-N (naive) for control, doublet (encorafenib+cetuximab) or triplet treatments, n= 9-39 xenografts per condition. Values are presented as mean ± SEM. On the right side, progression-free survival curves (PFS), with the median survival indicated for each group in the same graph. **B,** Waterfall plot depicting best response of the indicated PDX for each individual tumor. Scores greater than 20% (red line) indicate progressive disease (PD). Scores lower than 30% (green line) indicate partial response (PR). Scores between these values indicate stabilized disease (SD). CR: complete responses. **C,** Expression of DUSP6 (left) and SPRY4 (right) of the indicated subcutaneous xenografts at short time (ST), long time (LT) and end point (EP), evaluated by qRT-PCR (n= 3-6). Mean ± SEM. r. u. relative units. **D,** Individual tumor growth curves of the indicated subcutaneous xenografts treated with the triplet therapy. **E,** Venn diagram showing the common and the specifics mutations evaluated by WES between control PDX tumors and those treated with the triplet therapy.

**Supplementary Figure 3. MAPK pathway inhibition dominates whole gene expression in BRAFV600E CRC.**

**A,** Heatmap representing differentially expressed genes in any of the conditions indicated. Right panel shows, for each cluster, a grouped expression of all genes in each-time point and top 5 most significantly enriched gene sets. **B,** GSEA results for representative gene sets in selected categories at long term (LT).

**Supplementary Figure 4. Methylation status upon triplet treatment.**

**A,** Density plot comparing the general methylation status of TCGA-COAD BRAFV600E samples versus our PDX models. **B,** Bar plot depicting the relative frequency of different genomic regions showing methylation changes over time after triplet treatment in the indicated PDX. **C,** Scatter plot showing the relationship between gene expression and the methylation levels of their promoters (TSS200 region) in the M64-N PDX model. Top, at short time. Bottom, long time. **D,** Scatter plot showing the relationship between gene expression and the methylation levels of their promoters (TSS200 region) in the indicated PDX at all time points. **C, D**, red squares highlight demethylated and higher expressed genes upon triplet treatment. Some genes following this pattern are indicated in red.

**Supplementary Figure 5. MAPK pathway inhibition promotes mucinous differentiation of tumor cells in *BRAFV600E* CRC.**

**A,** Basal expression of CLCA1 (top), MUC2 (middle) and MUC4 (bottom) at control short time (cST) of the indicated subcutaneous xenografts, evaluated by qRT-PCR (n= 3). Mean ± SEM. **B,** Expression of CLCA1 (top), MUC2 (middle) and MUC4 (bottom) of the indicated subcutaneous xenografts at short time (ST), long time (LT) and end point (EP), evaluated by qRT-PCR (n= 3). Mean ± SEM. **C,** Schematic representation of the intestinal secretory cell differentiation pathway. r. u. relative units in **A** and **B**.

**Supplementary Figure 6. MAPK pathway inhibition promotes mucinous differentiation of tumor cells in *BRAF*V600E CRC.**

**A,** Representative pictures of alcian blue staining at end point (EP) triplet treatment in the indicated PDX. **B,** Heat map depicting mucinous differentiation across various PDX models treated with the triplet therapy, as assessed by a pathologist. The numerical scale indicates the degree of mucinous differentiation, ranging from 0 (absence of mucinous differentiation) to 5 (maximum grade of mucinous differentiation). MS status: Microsatellite status. **C,** Representative images of hematoxylin and eosin, as well as alcian blue staining at the endpoint treatment (EP) in the CRC BRAFV600E subcutaneous xenograft HCOX5238. **D,** Tumor growth curves of HCOX5438 subcutaneous xenografts (n=6). Presented as Mean ± SD. **E,** Bubble plot representing NES and adjusted p value at different time points for naive models for goblet cell or Paneth cell signatures. **F,** Diagram detailing CRISPR-Cas9 system-based strategy used for GCNT1 and GCNT3 knockout in HT29 CRC cells. A GCNT1 and GCNT3-specific CRISPR guide oligo (sequence shown) was designed to target the third exon of the genes. CRISPR/Cas9-derived mutations leaded to a stop codon (***) in both alleles of GCNT1 and GCNT3 genes. **G,** Progression-free survival curves (PFS) of the indicated groups, with the median survival shown for each group within the graph. **H,** Top, Waterfall plot indicating best tumor response. Scores greater than 20% (red line) indicate progressive disease (PD). Scores lower than 30% (green line) indicate partial response (PR). Scores between these values indicate stabilized disease (SD). CR: Complete Response. Bottom, summary table with the number of tumors evaluated. **I,** Bar plot represents the percentage of cells in proliferation (Ki67-positive cells) (n= 10). Mean ± SEM. **J,** Bar plot represents the percentage of mucinous differentiation measured by alcian blue staining (n= 10). Mean ± SEM. **K,** Bar plot represents the proportion of goblet cells (MUC2 positive cells) (n=10). Mean ± SEM. r. u. relative units for panels **J** and **K**.

**Supplementary Figure7. Stroma remodeling is required for the acquisition of resistance to BRAFi in *BRAF*V600E CRC.**

**A,** Western blot of MMP7 in the indicated subcutaneous xenografts at short time (ST) and end point (EP). GAPDH was used as loading control. **B,** Representative pictures of MMP7 immunostaining at ST and EP in the indicated subcutaneous xenografts. Scale bar, 100 μm. **C,** Quantification of percentage of cancer-associated fibroblasts (% CAFs) in the indicated subcutaneous xenografts (n= 6 per PDX). Mean ± SEM. a-SMA: alpha-smooth muscle was used as CAF specific marker.

**D,** Representative pictures of α-SMA immunohistochemical staining at end point (EP) in representative subcutaneous xenografts (M64-N model).

**Supplementary Figure 8. MAPK pathway inhibition promotes signaling rewiring in *BRAF*V600E CRC tumors.**

**A,** Western blot of p-βCatenin, βCatenin, p-ERK, ERK, MMP7, p-GSK3β and GSK3β in the HT29 cell line. Laminin B1 and Vinculin were used as loading controls. **B,** Representative pictures of βCatenin at long term (LT) in the indicated subcutaneous xenografts. Scale bar, 100 μm. **C,** Bar plot showing the quantification of Wnt pathway activation by the percentage of cells positive for nuclear βcatenin. cST: Control ST, cEP: Control EP, tST: triplet ST, tLT: Triplet long time, tEP: triplet EP. **D,** Expression of MMP7, OLMF4, DUSP6 and PROM1 in HT29 cell line, evaluated by qRT-PCR (n= 3). Mean ± SEM. *p ≤ 0.05, **p ≤ 0.01, ***p ≤ 0.001, ****p ≤ 0.0001. r. u. relative units for panel **D**.

**Supplementary Figure 9.** **BRAFi therapies promote VEGFA secretion in *BRAF*V600E CRC.**

**A,** Basal expression of VEGFA in the control samples at short time (cST) of the indicated subcutaneous xenografts, evaluated by qRT-PCR (n= 3-6). Mean ± SEM. **B,** Expression of VEGFA of the indicated subcutaneous xenografts at short time (ST), long time (LT) and end point (EP), evaluated by qRT-PCR (n= 3-6). Mean ± SEM. **C**, UMAP showing the expression of VEGFA in tumor cells based on scRNAseq results in control and triplet treated M64-N model. **D,** Western blot of VEGFA in the indicated subcutaneous xenografts at Short Time (ST) and End Point (EP). GAPDH was used as loading control. **E,** Schematic representation of the compartments in a 3D culture with cells embedded in Matrigel. **F,** Western blot of VEGFA present in the supernatant (SN) and Matrigel (M) fractions of COLO205 cell line 3D cultures. Ponceau was used as loading control. **G,** Western blot of VEGFA present in the spheroid fraction of the indicated cell line in 3D cultures. Vinculin was used as a loading control. r.u. relative units for panels **A** and **B**.
